# Supplementary material for: Clinical predictors of symptom improvement failure in gastroparesis
Source: PubMed Central journal article supplement — Ann Gastroenterol. 2022 Feb 14;35(2):119–26. doi: 10.20524/aog.2022.0696 (PMC8922264; doi:10.20524/aog.2022.0696), 2022-02-14
Supplement: AnnGastroenterol-35-119_Suppl1.pdf [file AnnGastroenterol-35-119_Suppl1.pdf]

### Supplementary material

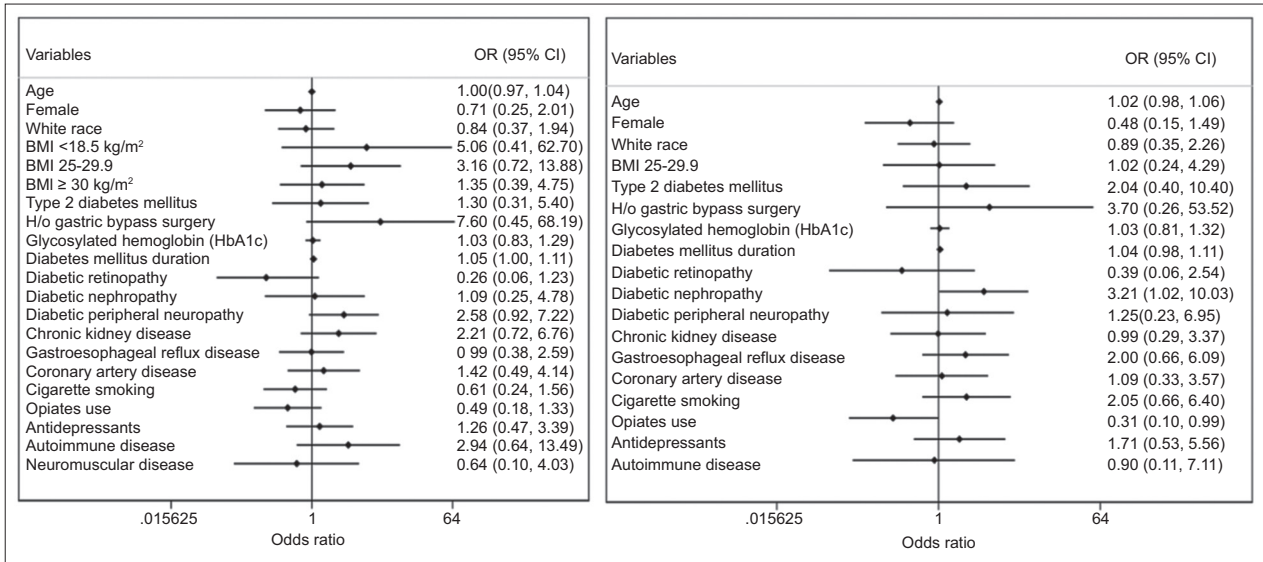

**Supplementary Figure 1** (A, B) Predictors of failure of clinical improvement at 4 and 12 weeks after diagnosis of gastroparesis in diabetics  
*BMI, body mass index*

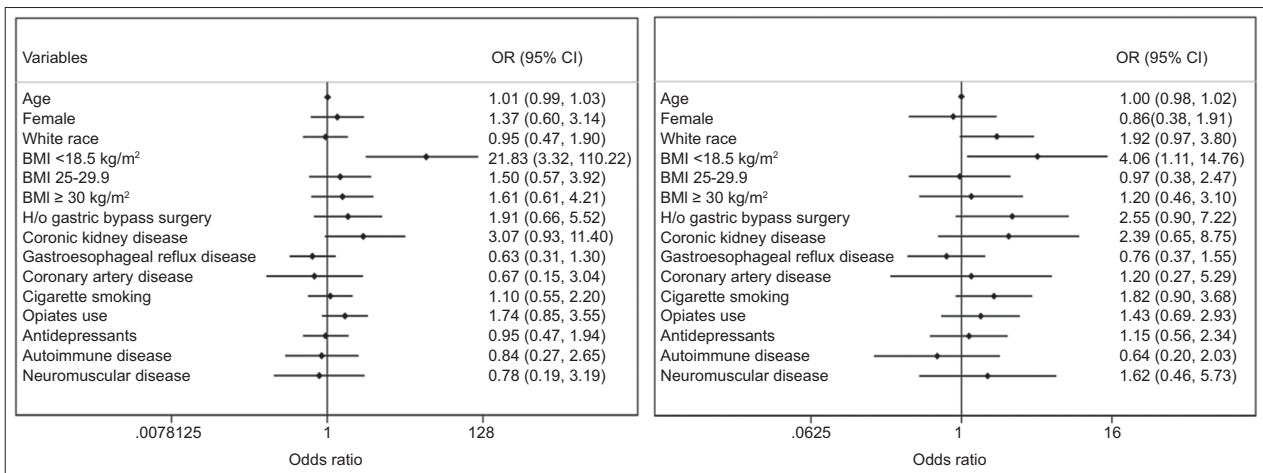

**Supplementary Figure 2** (A, B) Predictors of failure of clinical improvement at 4 and 12 weeks after diagnosis of gastroparesis in non-diabetics  
*BMI, body mass index*
